# Supplementary material for: Genetic Variant in GRM1 Underlies Congenital Cerebellar Ataxia with No Obvious Intellectual Disability
Source: Int J Mol Sci. 2023 Jan 12;24(2):1551. doi: 10.3390/ijms24021551 (PMC9865416; doi:10.3390/ijms24021551)
Supplement: Supplementary file 1 [file ijms-24-01551-s001.zip › Supplemental Table S1.xlsx]

## Sheet: Table S1
	Table S1. Comparison of the clinical characteristics of patients with different mutations and single nucleotide variations in GRM1 gene.
	Substitution in Protein	Affected Protein isoform	RS	Genotype	Consequence type	Phenotype description	Reference
	Autosomal recessive spinocerebellar ataxia type 13, SCAR13
	p.G240*	alpha&beta	-	homozygous	nonsense	SCAR13; early-onset; developmental delay; severe intellectual disability; aggressive behavior; absent speech; cerebellar ataxia; dysarthria; hyperreflexia; dysmetria; quadrupedal gait; non-progressive; peripheral neuropathy; eye ptosis; strabismus; pes planus	Yousaf et al., 2022
	p.G240R	alpha&beta	-	homozygous	missense	SCAR13; early-onset; developmental delay; from severe to moderate intellectual disability; aggressive behavior; poor speech; gait ataxia; spasticity; eye abnormalities; dental anomalies; skeletal defect; ears shape anomalies	Rassol et al., 2021
	p.R297*	alpha&beta	-	homozygous	nonsense	SCAR13; early-onset; a severe and global developmental delay; intellectual disability; autism spectrum disorder; absent speech; slowly progressive cerebellar atrophy; lack of walking; axial hypotonia; dysmetria; pyramidal signs; convergent strabismus; vertical gaze-evoked nystagmus; limited ocular abduction; slight facial dysmorphic features; a tendency to joint hyperlaxity	Cabet et al., 2019
	p.L454F	alpha&beta	-	homozygous	missense	SCAR13; early-onset; developmental delay; from severe to moderate intellectual disability; aggressive behavior; derangement of speech; cerebellar atrophy; gait and stance ataxia; seizure; nystagmus; esotropia in one patient; short stature	Davarniya et al., 2015
	p.T824R	alpha&beta	-	homozygous	missense	SCAR13; early-onset; developmental delay; cerebellar hypoplasia; stance and gait ataxia; dysarthria; coarse discoordination when performing dynamic tests in the hands; no obvious intellectual disability	this study, patient AV-I
	deletion of TM7	alpha&beta	-	homozygous	splice site insertion/deletion	SCAR13; early-onset; global developmental delay; intellectual disability; impaired or absent speech; progressive generalized cerebellar atrophy, and inferior vermian hypoplasia and/or a constitutionally small; stance and gait ataxia; dysarthria; mild dysdiadochokinesia; dysmetria; tremors; hyperreflexia; mild pyramidal signs; different ophthalmological signs	Guergueltcheva et al., 2012
	Autosomal dominant spinocerebellar ataxia type 44
	p.Y262C	alpha&beta	-	heterozygous	missense	SCA44; late-onset; cerebellar ataxia with some cortical involvement causing spasticity, no evidence of cognitive impairment	Watson et al., 2017
	p.T719P	alpha&beta	-	heterozygous	missense	SCA44; late-onset	Ngo et al., 2020
	p.Y792C	alpha&beta	rs41305288	heterozygous	missense	SCA44; late-onset; cerebellar ataxia with some cortical involvement causing spasticity, no evidence of cognitive impairment	Watson et al., 2017; Ghorbani et al., 2022
	p.(Gly1056Argfs*49)	alpha	-	heterozygous	frame shift	SCA44; early-onset; intellectual disability; cerebellar ataxia without apparent cerebellar atrophy	Watson et al., 2017
	Mental illness, risk factors
	p.F122L	alpha&beta	-	heterozygous	missense	Schizophrenia, other neuropsychiatric disorders	Ayoub et al., 2012; Cho et al., 2014
	p.S189G	alpha&beta	-	heterozygous	missense	Severe mental illness	Ganesh et al., 2018
	p.T548M	alpha&beta	rs151255685	heterozygous	missense	Schizophrenia / bipolar disorder	Frank et al. 2011; Cho et al., 2014
	p.K563N	alpha&beta	rs201399008	heterozygous	missense	Schizophrenia / bipolar disorder	Frank et al. 2011; Cho et al., 2014
	p.L575V	alpha&beta	rs372316073	heterozygous	missense	Schizophrenia / bipolar disorder	Frank et al. 2011; Cho et al., 2014
	p.L602M	alpha&beta	-	heterozygous	missense	Schizophrenia / bipolar disorder	Frank et al. 2011; Cho et al., 2014
	p.I604M	alpha&beta	-	heterozygous	missense	Schizophrenia / bipolar disorder	Frank et al. 2011; Cho et al., 2014
	p.Y632H	alpha&beta	rs1450837030	heterozygous	missense	Schizoaffective disorder, other neuropsychiatric disorders	Ayoub et al., 2012; Cho et al., 2014
	p.A683E	alpha&beta	rs754697517	heterozygous	missense	Schizophrenia; cognitive deficit	Ayoub et al., 2012; Cho et al., 2014
	p.P729T	alpha&beta	-	heterozygous	missense	Schizophrenia / bipolar disorder	Cho et al., 2014
	p.P970L	alpha	-	heterozygous	missense	Schizoaffective disorder, other neuropsychiatric disorders	Ayoub et al., 2012
	p.P993S	alpha	rs1432380664	heterozygous	missense	Autism spectrum disorder	Waltes et al., 2014; Ali et al., 2014
	p.P1014S	alpha	rs6923492	heterozygous	missense	Schizophrenia; cognitive deficit, other neuropsychiatric disorders	Ayoub et al., 2012; Cho et al., 2014
	p.P1015A	alpha	rs761033890	heterozygous	missense	Schizophrenia	Ayoub et al., 2012; Cho et al., 2014
	Gene Duplication	alpha&beta	-			Attention deficit hyperactivity disorder	Elia et al., 2011
	Familial natural short sleep
	p.S458A	alpha&beta	-	heterozygous	missense	Sleep significantly shorter without any obvious negative health consequences	Shi et al., 2021
	p.R889W	beta	-	heterozygous	missense	Sleep significantly shorter without any obvious negative health consequences	Shi et al., 2021
